# Supplementary material for: The Role of Ongoing Dendritic Oscillations in Single-Neuron Dynamics
Source: PubMed Central journal article supplement (PMC2725317; doi:10.1371/journal.pcbi.1000493), 2009-09-04
Supplement: pcbi.1000493.s001.pdf [file pcbi.1000493.s001.pdf]

## Direct compartmental simulations support the weak coupling assumption

We simulated a cable in which we inserted the voltage-dependent conductances that underlie the Morris-Lecar type II oscillator in the end segments. This continuous cable model does not use the explicit assumption of weak coupling. The cable has diameter  $1\ \mu\text{m}$ , membrane capacitance  $C_m = 1\ \mu\text{F}/\text{cm}^2$ , intracellular resistivity  $R_i = 0.2\ \text{k}\Omega\ \text{cm}$ , and membrane resistance  $R_m = 20\ \text{k}\Omega\ \text{cm}^2$  with reversal potential  $E_L = -50$ . In order for the active segments to generate oscillations while using the same conductance densities as in the Morris-Lecar model (see Methods), the active segments needed to be at least  $150\ \mu\text{m}$  in length. Current  $I$  was injected into the active segments with the same current densities as in the Morris-Lecar model to produce oscillations. The leak conductance  $g_L$  in the active segments was decreased slightly to  $g_L = 0.3\ \text{mS}/\text{cm}^2$ . The cable was discretized into isopotential compartments with electrotonic length  $\Delta x = 0.04\ \lambda = 20\ \mu\text{m}$ . The length of the passive stretch of cable in between the active segments was varied and the phase-locked solution was determined numerically. Stability of a phase-locked solution was tested by adding  $0.1 - 0.6\ \mu\text{A}/\text{cm}^2$  to one of the active segments for a duration of  $100\ \text{ms}$  (black bars above voltage traces in figure S1). Results from these simulations agree with our analytical predictions, showing synchronized phase-locking for small  $L$ , a bistable regime around  $L \sim 1.5$  and anti-phase locking for larger  $L$  (figure S1).
